# Supplementary material for: Identification of Widespread Antibiotic Exposure in Patients With Cholera Correlates With Clinically Relevant Microbiota Changes
Source: PubMed Central journal article supplement (PMC6782107; doi:10.1093/infdis/jiz299), 2019-06-13
Supplement: jiz299_suppl_supplementary_data.pdf [file jiz299_suppl_supplementary_data.pdf]

1 SUPPLEMENTAL DATA

2 FIGURE S1

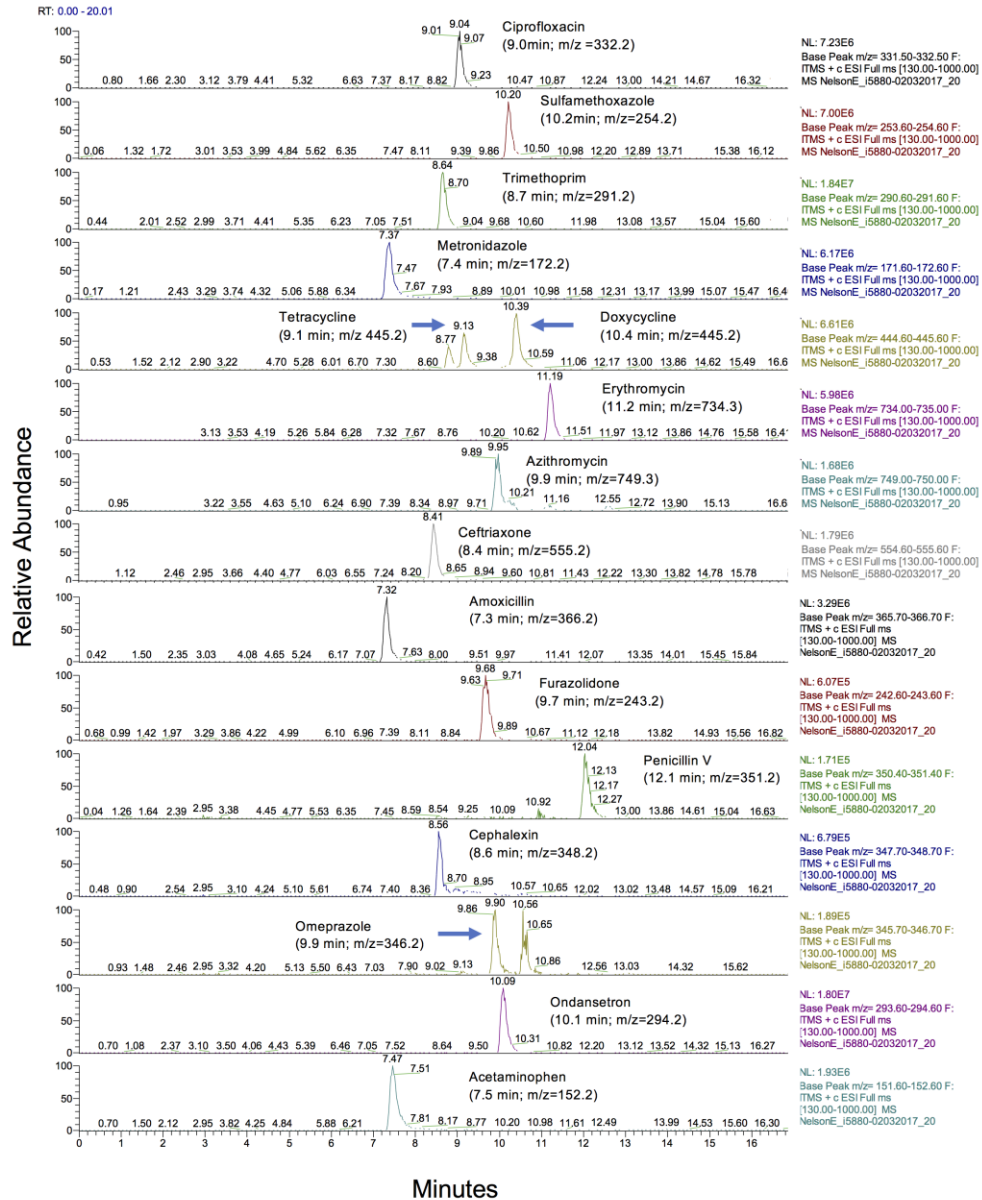

3

4 **Figure S1. Representative extracted ion chromatograms (EICs) of control antibiotic**  
5 **mixture showing 16 analytes.** X axis is the retention time (minutes) and Y is the relative  
6 abundance for each analyte; the scale is normalized to the largest peak in the selected time  
7 range. Doxycycline and tetracycline are displayed in the same EIC because the mass-to-charge  
8 ratio for each analyte is the same. Control antibiotic mixture was used to establish retention time  
9 and MS/MS data for analyte confirmation during sample analysis. Mass to charge ratios are  
10 included with the analyte label.

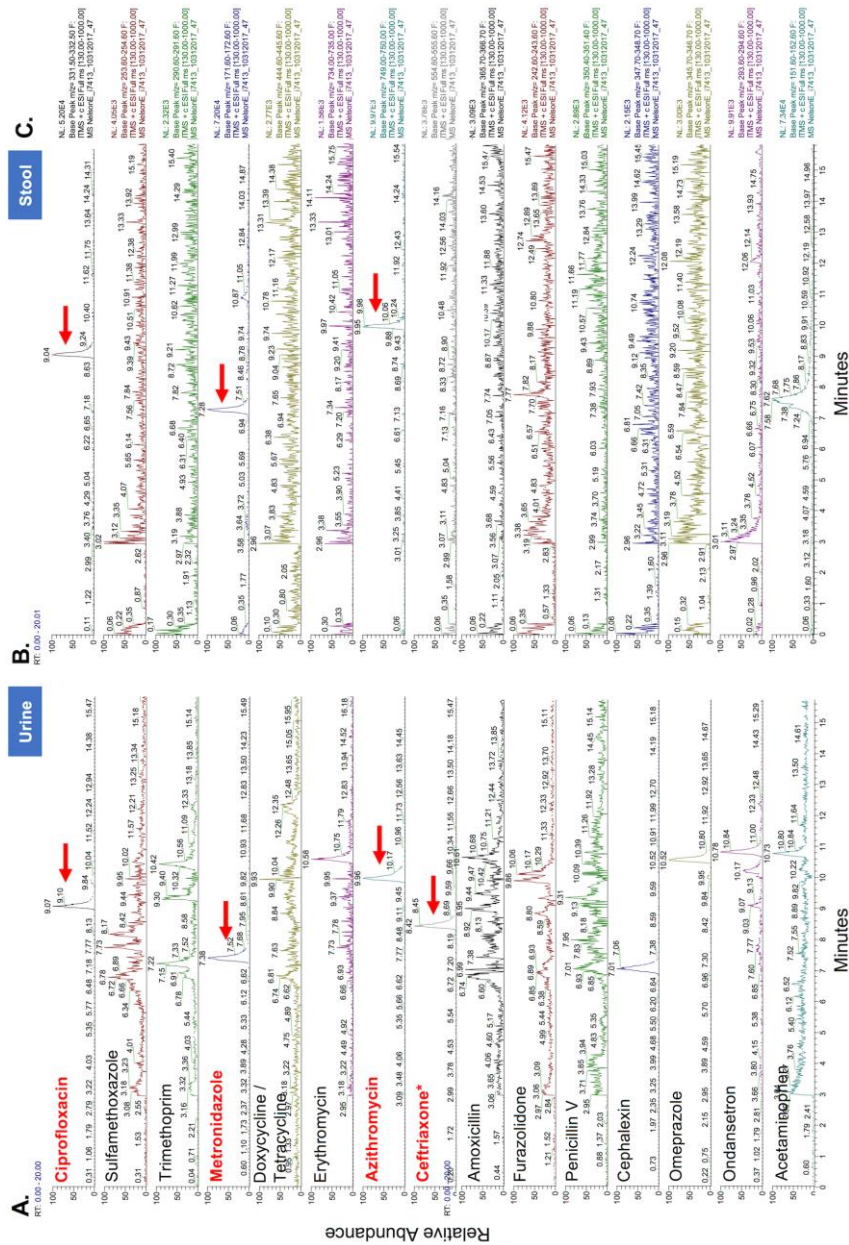

13 **Figure S2. Representative extracted ion chromatograms (EICs) of urine and cholera**  
 14 **stool.** LC/MS ion extracted chromatograms (EICs) for 16 targeted analytes (labeled on right)  
 15 for a paired urine sample (A) and stool sample (B) from a patient positive for *V. cholerae* by  
 16 PCR but negative by culture. X axis is the retention time (minutes) and Y is the relative  
 17 abundance for each analyte; the scale is normalized to the largest peak in the selected time  
 18 range. Identity of analytes was confirmed by retention time and MS/MS data. (C) Intensity, base  
 19 peak mass-to-charge ratio range, MS acquisition range.

20 FIGURE S3

21

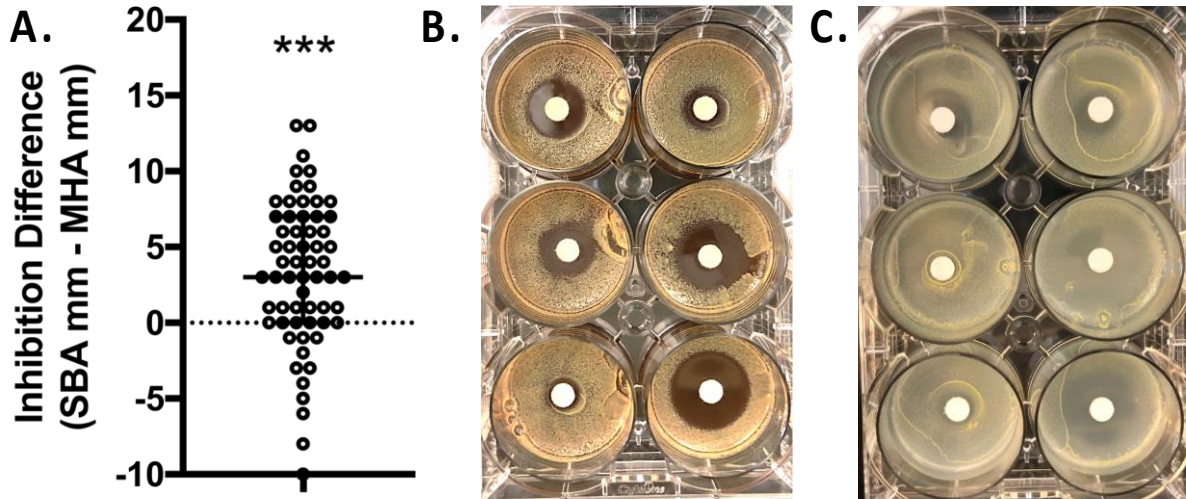

22

23 **Figure S3. Antimicrobial detection in urine samples by biologic assay. (A)** The distribution  
24 of the difference of the median diameter of the zone of inhibition of *Kocuria rhizophila* from  
25 cholera patient urine supernatants; N=60 samples positive for activity; controls not shown.  
26 Median and interquartile range shown. The analysis is derived from three independent assays  
27 on Sheep Blood Agar (SBA; **B**) versus Mueller-Hinton Agar (MHA; **C**); the Wilcoxon Signed-  
28 Rank statistic of 1341 was significant at  $p < 0.0001$  (\*\*\*)  
29

30 **FIGURE S4**

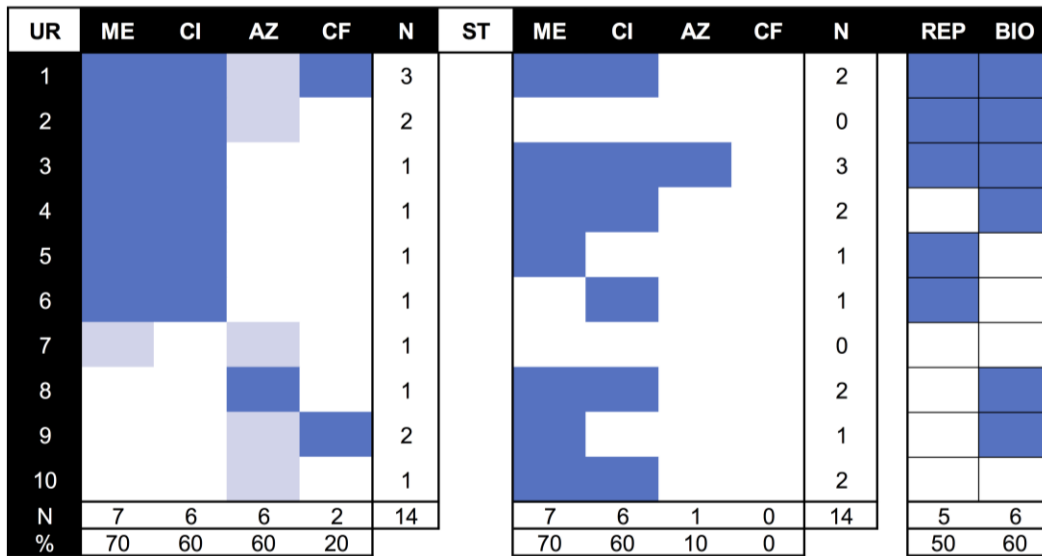

31

32

33

34

35

36

37

38

39

40

**Figure S4. Frequency of antibiotic detection in paired urine and stool samples from non-cholera patients.** Frequency of antibiotic detection by LC/MS of paired cholera patient urine (UR; left) and stool (ST; right), prior self-reported medication use (Rep) and biologic inhibition test with urine extract (Bio). Dark blue = positive, light blue = trace, and white = negative. Total antibiotic number is enumerated by column and row with percentage positive detection under totals. Trace amounts are considered as a positive detection and included in percentage calculations. CI= ciprofloxacin, ME=metronidazole, AZ=azithromycin, CF=ceftriaxone.

41 **Figure S5**  
42

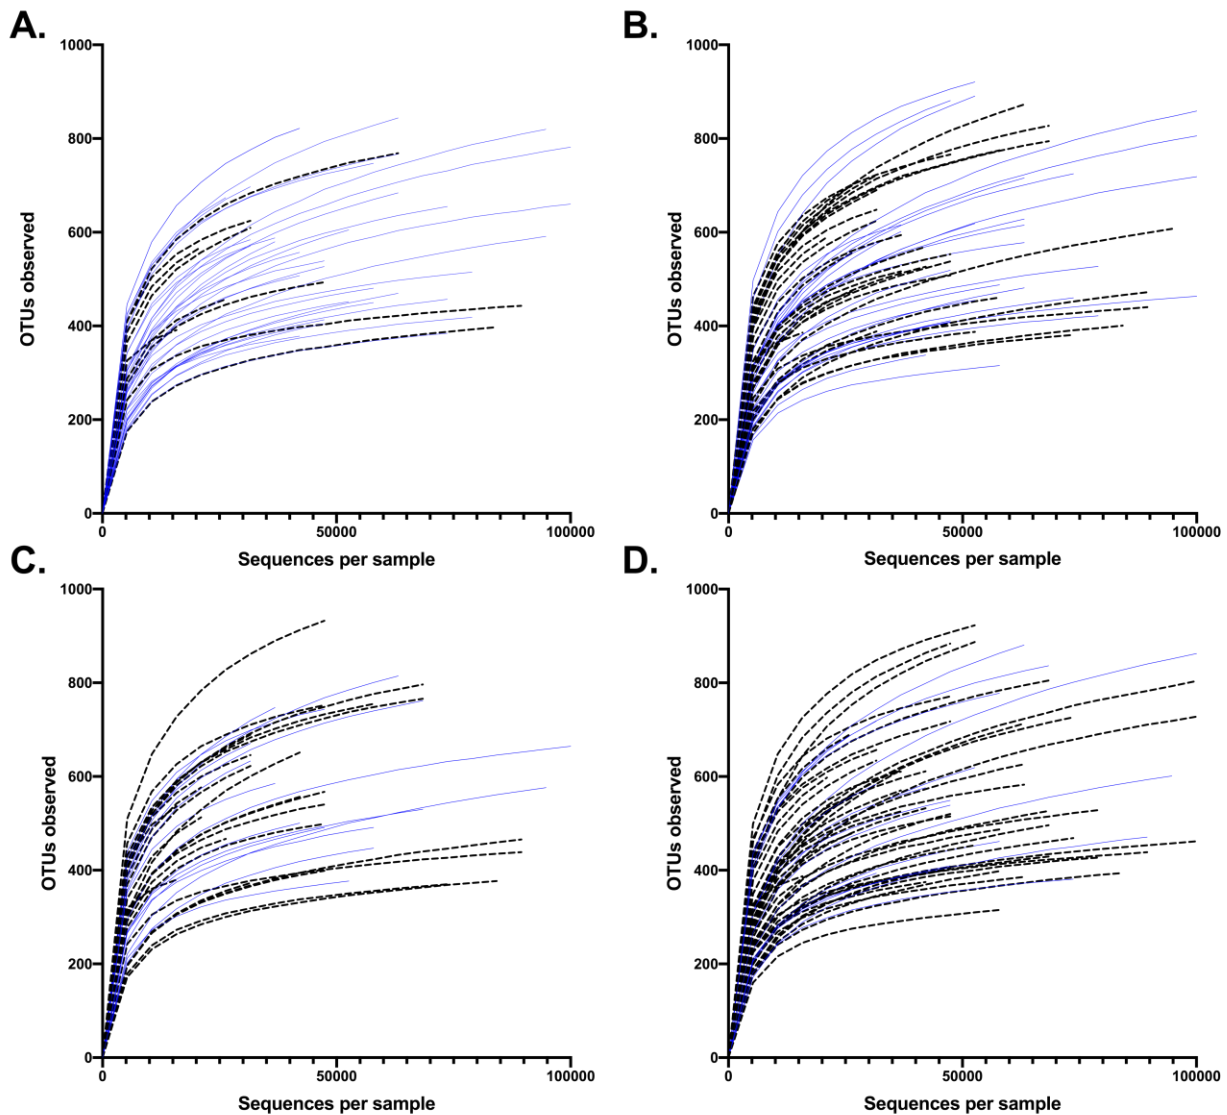

43  
44 **Figure S5. Bacterial diversity depicted by operational taxonomic unit (97% identify) and sequence number per sample for the following conditions: A.**  
45 **Any antibiotic vs no antibiotic detected. B. Metronidazole vs no metronidazole detected. C.**  
46 **Ciprofloxacin vs no ciprofloxacin/ no metronidazole detected. D. Azithromycin vs no**  
47 **azithromycin detected. Blue solid lines = antibiotic detected. Black dotted lines = did not**  
48 **contain the antibiotic. Samples with trace detection of the targeted antibiotic were**  
49 **removed. Data are derived from samples that did not harbor lytic vibriophages as tested**  
50 **by PCR. The alpha diversity for each bivariate comparison (panels A-D) was analyzed**  
51 **by the Mann-Whitney U test (two-tailed) at 15,000 and 30,000 sequences per sample.**  
52 **There was no difference in alpha diversity for each comparison ( $p > 0.05$ ).**  
53  
54  
55

56 **TABLE S1.**

57

58 **Table S1. Molecular reagents**

| Target                | Primer Name                    | Sequence 5' – 3'                                                                                   | Reference                |
|-----------------------|--------------------------------|----------------------------------------------------------------------------------------------------|--------------------------|
| <i>ompW</i>           | <i>ompW</i> _F                 | CACCAAGAAGGTGACTTTATTGTG                                                                           | Nandi et al.[27]         |
|                       | <i>ompW</i> _R                 | GAAGTTATAACCAACCCGCG                                                                               |                          |
| <i>tcpA</i>           | <i>tcpA</i> <sup>set1</sup> _F | ACTAAGGCTGCGCAAATCT                                                                                | Grembi &<br>Spormann[26] |
|                       | <i>tcpA</i> <sup>set1</sup> _R | GCCTCATCAGCTGAAACCTT                                                                               |                          |
| <i>tcpA</i>           | <i>tcpA</i> <sup>set2</sup> _F | ACACGATAAGAAAACCGGTCA                                                                              | Grembi &<br>Spormann[26] |
|                       | <i>tcpA</i> <sup>set2</sup> _R | GCCTTGGTCATATTCTGCGA                                                                               |                          |
| ICP1                  | ICP1gp58F                      | AACGCTGCTTTTCCTTTTGA                                                                               | Seed et al.[46]          |
|                       | ICP1gp58R                      | CCCAGCATTGAGGACACTT                                                                                |                          |
| ICP2                  | ICP2_4F                        | CGCTAGTTCTGGCAGTGA GT                                                                              | This study               |
|                       | ICP2_4R                        | TCCGTTCCAGTTCCAACAGG                                                                               |                          |
| ICP2                  | ICP2_24R                       | AGAAGTCGCAAACGGGGTAC                                                                               | This study               |
|                       | ICP2_24F                       | AACGTGGTTCTCGTGAGTGG                                                                               |                          |
| ICP3                  | ICP3gp5F                       | ATTGTGCGAGTGGGACAAAGG                                                                              | Seed et al.[46]          |
|                       | ICP3gp5R                       | ACCAACTCGACGCATAGCTT                                                                               |                          |
| 16S rDNA <sup>1</sup> | Maeda_1048_1067_F              | GTGSTGCAYGGYTGTGTCGTC                                                                              | Maeda et al.[47]         |
|                       | Maeda_1175_1194_R              | ACGTCRTCCMCACCTTCCTC                                                                               |                          |
| 16S rDNA <sup>2</sup> | 27F_Miseq                      | <u>AATGATACGGCGACCACCGAGATC</u>                                                                    | Chung et al.[28]         |
|                       |                                | <u>TACACTATGGTAATT</u> <i>cc</i> AGMGTTYG                                                          |                          |
|                       |                                | ATYMTGGCTCAG                                                                                       |                          |
|                       | 338rcbc1                       | <u>CAAGCAGAAGACGGGCATACGAGAT</u><br><b>ACGAGACTGATTAGTCAGTCAG</b> <i>Gaa</i><br>GCTGCCTCCCGTAGGAGT |                          |

59 <sup>1</sup> 16S rDNA primer pair used for nanoliter qPCR. Degenerate primers are coded per standard convention  
60 (<http://arep.med.harvard.edu/labgc/adnan/projects/Utilities/revcomp.html>).

61 <sup>2</sup> Example of 16S rDNA primer pair used for microbiome analysis. Degenerate primers are coded per standard  
62 convention. Structure of forward primer: (i) 5' Illumina adapter, (ii) *Forward primer pad*, (iii) Forward primer linker  
63 (lower case), (iv) Forward primer. Structure of reverse primer example: (i) Reverse complement of 3' Illumina adapter  
64 (underlined), (ii) Golay barcode (bold text), (iii) Reverse primer pad (italics), (iv) Reverse primer linker (lower case),  
65 (v) Reverse primer.

66 **Table S2.**

67  
68  
69  
70  
71

**Table S2. Antibiotic impact on microbiota**

|                                    | Any Antibiotic |           |                   |                  |                | Metronidazole |       |                   |                      |                  | Ciprofloxacin |                 |                   |                |                | Azithromycin |           |                   |                |                |
|------------------------------------|----------------|-----------|-------------------|------------------|----------------|---------------|-------|-------------------|----------------------|------------------|---------------|-----------------|-------------------|----------------|----------------|--------------|-----------|-------------------|----------------|----------------|
|                                    | Pos            | Neg       | Fold <sup>1</sup> | p <sup>2</sup>   | p <sup>3</sup> | Pos           | Neg   | Fold <sup>1</sup> | p <sup>2</sup>       | p <sup>3</sup>   | Pos           | Neg             | Fold <sup>1</sup> | p <sup>2</sup> | p <sup>3</sup> | Pos          | Neg       | Fold <sup>1</sup> | p <sup>2</sup> | p <sup>3</sup> |
| PERMANOVA (Bray Curtis):<br>N      | 34             | 9         | ---               | 0.05<br>7        | ---            | 29            | 29    | ---               | <b>0.001</b>         | ---              | 16            | 24 <sup>4</sup> | ---               | 0.158          | ---            | 17           | 43        | ---               | <b>0.041</b>   | ---            |
| Absolute Abundance: CT             |                |           |                   |                  |                |               |       |                   |                      |                  |               |                 |                   |                |                |              |           |                   |                |                |
| Vibrio cholerae                    | 23.9<br>9      | 19.37     | <b>-24.6</b>      | <b>0.03</b><br>9 | ---            | 22.90         | 22.08 | -1.8              | 0.330                | ---              | 25.53         | 21.78           | <b>-13.5</b>      | 0.074          | ---            | 23.40        | 21.7<br>8 | -3.1              | <b>0.042</b>   | ---            |
| Total Bacteria (16S)               | 14.4<br>1      | 12.87     | -2.9              | 0.09<br>8        | ---            | 14.03         | 13.43 | -1.5              | 0.415                | ---              | 15.09         | 12.87           | -4.7              | <b>0.009</b>   | ---            | 14.00        | 13.7<br>9 | -1.2              | 0.943          | ---            |
| Relative Abundance: % <sup>5</sup> |                |           |                   |                  |                |               |       |                   |                      |                  |               |                 |                   |                |                |              |           |                   |                |                |
| Vibrio                             | 3.00           | 12.00     | -4.0              | 0.57<br>1        | 0.634          | 14.00         | 6.00  | +2.3              | 0.133                | 0.148            | 3.50          | 4.00            | 1.1               | 0.571          | 0.961          | 0.68         | 17.0<br>0 | <b>25.0</b>       | <b>0.004</b>   | <b>0.040</b>   |
| Enterobacteriaceae <sup>6</sup>    | 2.00           | 2.00      | 1.0               | 0.65<br>4        | 0.654          | 6.00          | 0.82  | <b>+7.3</b>       | <b>0.017</b>         | <b>0.038</b>     | 0.76          | 2.00            | 2.6               | 0.908          | 0.990          | 2.00         | 2.00      | 1.0               | 0.432          | 0.617          |
| Streptococcus (early)              | 5.00           | 0.76      | <b>+6.6</b>       | <b>0.05</b><br>0 | 0.100          | 6.00          | 2.00  | +3.0              | <b>0.033</b>         | 0.055            | 2.50          | 2.00            | 1.3               | 0.769          | 0.961          | 1.00         | 3.00      | 3.0               | 0.919          | 0.919          |
| Enterococcus (early)               | 0.02           | <0.0<br>0 | +3.8              | 0.24<br>0        | 0.322          | 0.03          | 0.01  | +4.6              | 0.085                | 0.106            | 0.02          | 0.01            | 2.4               | 0.990          | 0.990          | 0.01         | 0.02      | 2.3               | 0.730          | 0.811          |
| Bacteroides (middle)               | 0.09           | 2.00      | <b>-21.3</b>      | <b>0.01</b><br>9 | 0.095          | 0.05          | 0.46  | <b>-9.5</b>       | <b>0.011</b>         | <b>0.037</b>     | 0.39          | 0.57            | 1.4               | 0.450          | 0.961          | 0.06         | 0.19      | 3.3               | 0.204          | 0.408          |
| Prevotella (late)                  | 0.37           | 22.00     | <b>-59.5</b>      | <b>0.03</b><br>0 | 0.100          | 0.09          | 2.00  | <b>-22.8</b>      | <b>&lt;0.00</b><br>1 | <b>&lt;0.001</b> | 2.55          | 7.00            | 2.7               | 0.448          | 0.961          | 0.48         | 0.69      | 1.4               | 0.682          | 0.811          |
| Roseburia (late)                   | 0.01           | 0.07      | -6.2              | 0.15<br>5        | 0.259          | 0.01          | 0.05  | <b>-7.8</b>       | <b>0.019</b><br>0    | <b>0.038</b>     | 0.11          | 0.07            | 1.4               | 0.63           | 0.961          | 0.01         | 0.04      | 3.2               | 0.164          | 0.408          |
| Brachyspira                        | 0.07           | 0.01      | <b>+7.1</b>       | <b>0.04</b><br>0 | 0.100          | 0.03          | 0.02  | +1.1              | 0.868                | 0.868            | 0.25          | 0.02            | <b>13.3</b>       | <b>0.024</b>   | 0.240          | 0.05         | 0.01      | 4.0               | 0.080          | 0.400          |
| Blautia                            | 0.04           | 0.19      | -4.3              | 0.25<br>7        | 0.322          | 0.03          | 0.11  | -3.3              | <b>0.045</b><br>8    | 0.065            | 0.10          | 0.11            | 1.1               | 0.69           | 0.961          | 0.03         | 0.10      | 3.4               | 0.304          | 0.507          |
| Ruminococcus                       | 0.18           | 3.00      | <b>-17.1</b>      | <b>0.01</b><br>2 | 0.095          | 0.16          | 1.00  | <b>-6.3</b>       | <b>0.000</b><br>8    | <b>0.004</b>     | 0.65          | 1.50            | 2.3               | 0.229          | 0.961          | 0.01         | 0.04      | 3.8               | 0.150          | 0.408          |

72 <sup>1</sup> Fold change between antibiotic and no-antibiotic conditions. Fold changes greater than 5 fold are bold.  
73 <sup>2</sup> Mann-Whitney U test. Significance assigned at p < 0.050 and designated by bold text.  
74 <sup>3</sup> Adjusted p values to account for increased false discovery rate given multiple comparisons (N=10) using the Benjamini-Hochberg method [48].  
75 <sup>4</sup> Sample size = 23 for qPCR analysis.  
76 <sup>5</sup> Median percent value given. 'Early', 'middle' and 'late' are categories of genera seen during phases of recovery from cholera as previously described[16]. The ranking by mean relative  
77 abundance independent of stratification for each of the ten genera from top to bottom are 1, 2, 3, 7, 17, 5, 37, 6, 24, and 34, respectively.  
78 <sup>6</sup> 16S analysis did identify Escherichia apart from other genera within the Enterobacteriaceae family. Enterobacteriaceae is grouped with 'early' based published data on Escherichia[16].  
79

80 **Text S1.**

81

82 **Supplementary Methods.**

83 **Microbiota analysis parameters.** Qiagen CLC Workbench V13.8 parameters were as  
84 follows: (i) Minimum number of reads per sample = 100 and minimum percent from the  
85 median = 50.0. (ii) Quality limit = 0.05, ambiguous limit = 2, short reads were discarded,  
86 and minimum number of nucleotides in reads = 15. (iii) Reference based OTU clustering  
87 used the Greengenes Version 13.8 database, the threshold for taxonomic similarity =  
88 97%, minimum occurrence = 2, chimera crossover cost = 3, Kmer size = 6, mismatch  
89 cost = 1, minimum score = 40, gap cost = 4, and maximum unaligned end mismatches  
90 = 5.  
91
